# Supplementary material for: Bioinformatics analysis of laryngeal squamous cell carcinoma based on the high infection rate of HPV in Northwest China
Source: PeerJ. 2025 Aug 11;13:e19851. doi: 10.7717/peerj.19851 (PMC12352419; doi:10.7717/peerj.19851)
Supplement: Supplemental Information 2 [file peerj-13-19851-s002.xls]

## Sheet: Sheet1
ITEM TO CHECK	IMPORTANCE	CHECKLIST
EXPERIMENTAL DESIGN
Definition of experimental and control groups	E	√page4-134，135	√: Information is included in the text. ∅: Information is not available. NA: Not applicable. AB:Attached below the form
Number within each group	E	√page4-134，135	SM：Information is provided in Supplementary Materials
Assay carried out by core lab or investigator's lab?	D	NA
Acknowledgement of authors' contributions	D	NA
SAMPLE
Description	E	√
Volume/mass of sample processed	D	NA
Microdissection or macrodissection	E	NA
Processing procedure	E	AB
If frozen - how and how quickly?	E	NA
If fixed - with what, how quickly?	E	NA
Sample storage conditions and duration (especially for FFPE samples)	E	NA
NUCLEIC ACID EXTRACTION
Procedure and/or instrumentation	E	√page4-139
Name of kit and details of any modifications	E	√page4-135,136,138,139
Source of additional reagents used	D	NA
Details of DNase or RNAse treatment	E	√page4-136,137
Contamination assessment (DNA or RNA)	E	SM
Nucleic acid quantification	E	SM
Instrument and method	E	√page4-140
Purity (A260/A280)	D	SM
Yield	D	SM
RNA integrity method/instrument	E	SM
RIN/RQI or Cq of 3' and 5' transcripts	E	NA
Electrophoresis traces	D	NA
Inhibition testing (Cq dilutions, spike or other)	E	NA
REVERSE TRANSCRIPTION
Complete reaction conditions	E	√page4-137
Amount of RNA and reaction volume	E	SM
Priming oligonucleotide (if using GSP) and concentration	E	NA
Reverse transcriptase and concentration	E	AB
Temperature and time	E	AB
Manufacturer of reagents and catalogue numbers	D	AB
Cqs with and without RT	D*	NA
Storage conditions of cDNA	D	AB
qPCR TARGET INFORMATION
If multiplex, efficiency and LOD of each assay.	E	NA
Sequence accession number	E	√page5-145-149
Location of amplicon	D	NA
Amplicon length	E	√page5-145-149
In silico specificity screen (BLAST, etc)	E	NA
Pseudogenes, retropseudogenes or other homologs?	D	NA
Sequence alignment	D	NA
Secondary structure analysis of amplicon	D	∅
Location of each primer by exon or intron (if applicable)	E	NA
What splice variants are targeted?	E	NA
qPCR OLIGONUCLEOTIDES
Primer sequences	E	√page5-145-149
RTPrimerDB Identification Number	D	∅
Probe sequences	D**	NA
Location and identity of any modifications	E	NA
Manufacturer of oligonucleotides	D	AB
Purification method	D	NA
qPCR PROTOCOL
Complete reaction conditions	E	AB
Reaction volume and amount of cDNA/DNA	E	AB
Primer, (probe), Mg++ and dNTP concentrations	E	AB
Polymerase identity and concentration	E	AB
Buffer/kit identity and manufacturer	E	AB
Exact chemical constitution of the buffer	D	∅
Additives (SYBR Green I, DMSO, etc.)	E	AB
Manufacturer of plates/tubes and catalog number	D	AB
Complete thermocycling parameters	E	AB
Reaction setup (manual/robotic)	D	AB
Manufacturer of qPCR instrument	E	√page5-141
qPCR VALIDATION
Evidence of optimisation (from gradients)	D	∅
Specificity (gel, sequence, melt, or digest)	E	AB
For SYBR Green I, Cq of the NTC	E	AB
Standard curves with slope and y-intercept	E	AB
PCR efficiency calculated from slope	E	∅
Confidence interval for PCR efficiency or standard error	D	∅
r2 of standard curve	E	∅
Linear dynamic range	E	AB
Cq variation at lower limit	E	AB
Confidence intervals throughout range	D	∅
Evidence for limit of detection	E	NA
If multiplex, efficiency and LOD of each assay.	E	NA
DATA ANALYSIS
qPCR analysis program (source, version)	E	AB
Cq method determination	E	AB
Outlier identification and disposition	E	AB
Results of NTCs	E	AB
Justification of number and choice of reference genes	E	AB
Description of normalisation method	E	NA
Number and concordance of biological replicates	D	AB
Number and stage (RT or qPCR) of technical replicates	E	AB
Repeatability (intra-assay variation)	E	NA
Reproducibility (inter-assay variation, %CV)	D	NA
Power analysis	D	NA
Statistical methods for result significance	E	AB
Software (source, version)	E	AB
Cq or raw data submission using RDML	D	SM
Table 1. MIQE checklist for authors, reviewers and editors. All essential information (E) must be submitted with the manuscript. Desirable
information (D) should be submitted if available. If using primers obtained from RTPrimerDB, information on qPCR target, oligonucleotides,
protocols and validation is available from that source.
*: Assessing the absence of DNA using a no RT assay is essential when first extracting RNA. Once the sample has been validated as
RDNA-free, inclusion of a no-RT control is desirable, but no longer essential.
**: Disclosure of the probe sequence is highly desirable and strongly encouraged. However, since not all commercial pre-designed assay
vendors provide this information, it cannot be an essential requirement. Use of such assays is advised against.
Processing procedure：
Contamination assessment (DNA or RNA)，RNA integrity method/instrument：SM（琼脂糖凝胶实验）
Nucleic acid quantification ， Purity (A260/A280) ， Yield，Amount of RNA and reaction volume：SM（表格）
Reverse transcription Complete reaction conditions: Reactions were prepared on ice Reverse transcriptase and concentration: The 10X SuperScript™ Enzyme Mix includes SuperScript™ III RT(400 U/µL) Temperature and time: 10 min @ 25 °C + 30 min @ 50 °C + 5 min @ 85 °C + ice Manufacturer of reagents and catalog numbers: Invitrogen (Catalog Number 11754-050) Storage conditions of cDNA: -80 °C qPCR prot…
Manufacturer of oligonucleotides:Servicebio(Wuhan, China)
qPCR validation Specificity (gel, sequence, melt, or digest): Melt curves from 60 - 95 °C on 7900HT Fast Real-Time PCR System For SYBR Green I, Cq of the NTC :no signal Cq variation at lower limit:±1.0
Data analysis qPCR analysis program (source, version): 7900HT Fast Real-Time PCR System Method of Cq determination: Manual positioning above background signal Outlier identification and disposition：No outlier Results of NTCs :No amplified signal condition Justification of number and choice of reference genes:we deliberately chose reference genes that are not directly involved in this specific bio…
