# Supplementary material for: Bioinformatics analysis of laryngeal squamous cell carcinoma based on the high infection rate of HPV in Northwest China
Source: PeerJ. 2025 Aug 11;13:e19851. doi: 10.7717/peerj.19851 (PMC12352419; doi:10.7717/peerj.19851)
Supplement: Supplemental Information 3 [file peerj-13-19851-s003.xlsx]

## Sheet: Sheet1
patient	age	gender	HPV test results
patient 1	64	man	HPV11
patient 2	60	man	HPV11
patient 3	54	man	HPV11
patient 4	71	man	HPV16
patient 5	61	man	HPV16
patient 6	66	man	HPV16
patient 7	69	man	HPV16
patient 8	60	man	HPV16
patient 9	79	man	HPV16
patient 10	84	man	HPV16
patient 11	81	man	HPV16
patient 12	61	man	HPV16
patient 13	51	man	HPV16
patient 14	61	woman	HPV16
patient 15	72	man	HPV16
patient 16	69	man	HPV16
patient 17	67	man	HPV16
patient 18	56	man	HPV16
patient 19	62	man	HPV16
patient 20	67	man	HPV16
patient 21	70	man	HPV16
patient 22	46	man	HPV16
patient 23	42	man	HPV16
patient 24	74	man	HPV16
patient 25	55	man	HPV16
patient 26	70	man	HPV16
patient 27	75	man	HPV16
patient 28	65	man	HPV16
patient 29	56	man	HPV16
patient 30	71	man	HPV16
patient 31	58	woman	HPV16
patient 32	82	woman	HPV16
patient 33	81	man	HPV16
patient 34	66	man	HPV16
patient 35	55	man	HPV16
patient 36	64	man	HPV16
patient 37	81	man	HPV16
patient 38	55	man	HPV16
patient 39	72	woman	HPV16
patient 40	60	man	HPV16
patient 41	57	man	HPV16
patient 42	71	man	HPV16
patient 43	63	man	HPV16
patient 44	55	man	HPV16
patient 45	79	man	HPV16
patient 46	52	man	HPV16
patient 47	54	man	HPV16
patient 48	60	man	HPV16
patient 49	58	man	HPV16
patient 50	69	man	HPV16
patient 51	49	man	HPV16
patient 52	49	man	HPV16
patient 53	75	man	HPV16
patient 54	67	man	HPV16
patient 55	65	man	HPV16
patient 56	63	man	HPV16
patient 57	59	man	HPV16，18
patient 58	76	man	HPV16，33
patient 59	55	man	HPV16，33
patient 60	60	man	HPV16，52
patient 61	63	man	HPV33
patient 62	75	man	HPV33
patient 63	54	man	HPV35
patient 64	57	man	HPV52
patient 65	54	man	negative
patient 66	59	man	negative
patient 67	59	man	negative
patient 68	57	man	negative
patient 69	65	man	negative
patient 70	40	man	negative
patient 71	84	man	negative
patient 72	71	man	negative
patient 73	79	man	negative
patient 74	68	man	negative
patient 75	53	man	negative
patient 76	70	woman	negative
patient 77	58	man	negative
patient 78	77	man	negative
patient 79	75	man	negative
patient 80	87	man	negative
patient 81	56	man	negative
patient 82	67	man	negative
patient 83	75	man	negative
patient 84	60	man	negative
patient 85	68	man	negative
patient 86	40	man	negative
patient 87	71	man	negative
patient 88	52	man	negative
patient 89	52	man	negative
patient 90	66	man	negative
patient 91	64	man	negative
patient 92	51	man	negative
patient 93	66	man	negative
patient 94	68	man	negative
patient 95	57	man	negative
patient 96	54	man	negative
patient 97	61	man	negative
patient 98	75	man	negative
patient 99	70	woman	negative
patient 100	72	man	negative
patient 101	65	man	negative
patient 102	75	man	negative
patient 103	56	man	negative
patient 104	66	man	negative
patient 105	41	man	negative
patient 106	73	man	negative
patient 107	65	man	negative
patient 108	59	man	negative
patient 109	79	man	negative
patient 110	58	man	negative
patient 111	60	man	negative
patient 112	75	man	negative
patient 113	77	man	negative
patient 114	64	man	negative
patient 115	74	man	negative
