# Supplementary material for: Bioinformatics analysis of laryngeal squamous cell carcinoma based on the high infection rate of HPV in Northwest China
Source: PeerJ. 2025 Aug 11;13:e19851. doi: 10.7717/peerj.19851 (PMC12352419; doi:10.7717/peerj.19851)
Supplement: Supplemental Information 4 [file peerj-13-19851-s004.xlsx]

## Sheet: Sheet1
control group：TU212CON				experimental group：TU212HPV
sample	Ct	average Ct		sample	Ct	Δ	Δ average	ΔΔCt	2^-ΔΔCt
actin-Con	14.11			TU212CON	29.2	14.6567		-0.533333	1.44727
actin-Con	14.91			TU212CON	29.51	14.9667		-0.223333	1.16743
actin-Con	14.61	14.5433		TU212CON	30.49	15.9467	15.19	0.756667	0.591862
actinHPV16E7	13.99			TU212HPV16E7	21.05	7.07333		-8.11667	277.562
actinHPV16E7	13.84			TU212HPV16E7	20.84	6.86333		-8.32667	321.053
actinHPV16E7	14.1	13.9767		TU212HPV16E7	20.53	6.55333		-8.63667	398.012
