# Supplementary material for: Bioinformatics analysis of laryngeal squamous cell carcinoma based on the high infection rate of HPV in Northwest China
Source: PeerJ. 2025 Aug 11;13:e19851. doi: 10.7717/peerj.19851 (PMC12352419; doi:10.7717/peerj.19851)
Supplement: Supplemental Information 6 [file peerj-13-19851-s006.xlsx]

## Sheet: 132+hpv RNA 2022_6_9 21_41_21
sample name	nucleic acid(ng/uL)	A260/A280	A260/A230	A260	A280	Nucleic acid coefficient	baseline correction (nm)	base absorbance
TU212CON-1	938.207	2.114	2.159	23.455	11.096	40	340	0.355
TU212CON-2	891.017	2.126	2.152	22.275	10.476	40	340	0.368
TU212CON-3	900.692	2.118	2.149	22.517	10.63	40	340	0.213
TU212HPV-1	644.945	2.09	2.063	16.124	7.714	40	340	0.113
TU212HPV-2	655.964	2.125	2.073	16.399	7.719	40	340	0.257
TU212HPV-3	666.255	2.078	2.084	16.656	8.014	40	340	0.372
sample name	Amount of RNA	reaction volume:20uL
TU212CON-1	2.66466
TU212CON-2	2.80578
TU212CON-3	2.77564
TU212HPV-1	3.8763
TU212HPV-2	3.81118
TU212HPV-3	3.75232
