# Supplementary material for: Bioinformatics analysis of laryngeal squamous cell carcinoma based on the high infection rate of HPV in Northwest China
Source: PeerJ. 2025 Aug 11;13:e19851. doi: 10.7717/peerj.19851 (PMC12352419; doi:10.7717/peerj.19851)
Supplement: Supplemental Information 8 — All results of the GO and KEGG analyses performed on the differential genes and proteins. [file peerj-13-19851-s008.xlsx]

## Sheet: GO of DEPs with ↑ expression
GO enrichment analysis of differential proteins with elevated expression
Category	Term	GO ID	Count	%	P-Value
MF	catalytic activity	GO:0003824	54	42.9**	0.0033
CC	intracellular anatomical structure	GO:0005622	106	84.1*	0.013
CC	cytoplasm	GO:0005737	102	81.0***	1.3e-07
CC	organelle	GO:0043226	102	81.0*	0.014
CC	cytosol	GO:0005829	57	45.2***	8.5e-06
CC	cell periphery	GO:0071944	54	42.9**	0.0066
CC	extracellular region	GO:0005576	49	38.9***	2.9e-05
CC	extracellular space	GO:0005615	43	34.1***	1.5e-05
CC	cell junction	GO:0030054	30	23.8***	5e-05
CC	cell projection	GO:0042995	23	18.3*	0.037
CC	supramolecular complex	GO:0099080	17	13.5*	0.015
CC	cell leading edge	GO:0031252	12	9.5***	5.8e-05
BP	response to stimulus	GO:0050896	75	59.5***	5e-05
BP	immune system process	GO:0002376	27	21.4**	0.0029
BP	detoxification	GO:0098754	5	4.0*	0.012
BP	biological regulation	GO:0065007	93	73.8*	0.014
BP	viral process	GO:0016032	6	4.8*	0.022
BP	biological process involved in interspecies interaction between organisms	GO:0044419	25	19.8***	6.3e-05
* P < 0.05 **P<0.01 ***P<0.001

## Sheet: KEGG of DEPs with ↑ expression
KEGG enrichment analysis of differential proteins with elevated expression
Category	Term	KEGG ID	Count	%	P-Value
KEGG_PATHWAY	Metabolic pathways	hsa01100	20	15.9*	0.027
KEGG_PATHWAY	Pathways in cancer	hsa05200	13	10.3***	0.00076
KEGG_PATHWAY	Human papillomavirus infection	hsa05165	11	8.7***	0.00024
KEGG_PATHWAY	Focal adhesion	hsa04510	8	6.3***	0.00098
KEGG_PATHWAY	Leukocyte transendothelial migration	hsa04670	7	5.6***	0.00027
KEGG_PATHWAY	Cell adhesion molecules	hsa04514	7	5.6**	0.0014
KEGG_PATHWAY	Pathogenic Escherichia coli infection	hsa05130	7	5.6**	0.0049
KEGG_PATHWAY	Proteoglycans in cancer	hsa05205	7	5.6**	0.005
KEGG_PATHWAY	Human cytomegalovirus infection	hsa05163	7	5.6**	0.0082
KEGG_PATHWAY	Regulation of actin cytoskeleton	hsa04810	7	5.6**	0.0089
KEGG_PATHWAY	Shigellosis	hsa05131	7	5.6*	0.013
KEGG_PATHWAY	PI3K - Akt signaling pathway	hsa04151	7	5.6*	0.063
KEGG_PATHWAY	Bacterial invasion of epithelial cells	hsa05100	6	4.8***	0.00034
KEGG_PATHWAY	Tight junction	hsa04530	6	4.8*	0.01
KEGG_PATHWAY	Viral carcinogenesis	hsa05203	6	4.8*	0.022
KEGG_PATHWAY	Human immunodeficiency virus infection	hsa05170	6	4.8*	0.025
KEGG_PATHWAY	Endocytosis	hsa04144	6	4.8*	0.046
KEGG_PATHWAY	Axon guidance	hsa04360	5	4.0*	0.055
KEGG_PATHWAY	Kaposi sarcoma - associated herpesvirus infection	hsa05167	5	4.0*	0.067
KEGG_PATHWAY	Diabetic cardiomyopathy	hsa05415	5	4.0*	0.076
KEGG_PATHWAY	Rap1 signaling pathway	hsa04015	5	4.0*	0.083
KEGG_PATHWAY	Biosynthesis of amino acids	hsa01230	4	3.2*	0.021
KEGG_PATHWAY	HIF - 1 signaling pathway	hsa04066	4	3.2*	0.053
KEGG_PATHWAY	Yersinia infection	hsa05135	4	3.2*	0.093
KEGG_PATHWAY	Pyrimidine metabolism	hsa00240	3	2.4*	0.075
KEGG_PATHWAY	Mineral absorption	hsa04978	3	2.4*	0.082
* P < 0.05 **P<0.01 ***P<0.001

## Sheet: KEGG of key genes with ↑ expres
KEGG enrichment pathway of key genes with elevated protein expression
Category	Term	KEGG ID	Count	%	P-Value
KEGG_PATHWAY	Proteoglycans in cancer	hsa05205	5	45.5***	5.2e-05
KEGG_PATHWAY	Regulation of actin cytoskeleton	hsa04810	5	45.5***	8.3e-05
KEGG_PATHWAY	HIF-1 signaling pathway	hsa04066	4	36.4***	0.00021
KEGG_PATHWAY	Leukocyte transendothelial migration	hsa04670	4	36.4***	0.00025
KEGG_PATHWAY	Human papillomavirus infection	hsa05165	5	45.5***	0.00035
KEGG_PATHWAY	Focal adhesion	hsa04510	4	36.4**	0.0013
KEGG_PATHWAY	Rap1 signaling pathway	hsa04015	4	36.4**	0.0014
KEGG_PATHWAY	Pathways in cancer	hsa05200	5	45.5***	0.002
KEGG_PATHWAY	Shigellosis	hsa05131	4	36.4**	0.0023
KEGG_PATHWAY	Bacterial invasion of epithelial cells	hsa05100	3	27.3**	0.0033
KEGG_PATHWAY	Yersinia infection	hsa05135	3	27.3*	0.01
KEGG_PATHWAY	Pathogenic Escherichia coli infection	hsa05130	3	27.3*	0.021
KEGG_PATHWAY	Ras signaling pathway	hsa04014	3	27.3*	0.028
KEGG_PATHWAY	MAPK signaling pathway	hsa04010	3	27.3*	0.043
* P < 0.05 **P<0.01 ***P<0.001

## Sheet: GO of DEPs with ↓ expression
GO enrichment analysis of differential proteins with reduced expression
Category	Term	GO ID	Count	%	P-Value
MF	cytoskeletal motor activity	GO:0003774	4	3.5*	0.028
MF	structural molecule activity	GO:0005198	11	9.7*	0.03
BP	localization	GO:0051179	39	34.4*	0.01
BP	cellular process	GO:0009987	100	88.5*	0.019
BP	developmental process	GO:0032502	44	38.9*	0.035
* P < 0.05 **P<0.01 ***P<0.001

## Sheet: KEGG of DEPs with ↓ expressio
KEGG enrichment analysis of differential proteins with elevated expression
Category	Term	KEGG ID	Count	%	P-Value
KEGG_PATHWAY	Retinol metabolism	hsa00830	4	3.5*	0.011
KEGG_PATHWAY	Lysosome	hsa04142	5	4.4*	0.012
KEGG_PATHWAY	Malaria	hsa05144	3	2.7*	0.045
* P < 0.05 **P<0.01 ***P<0.001

## Sheet: GO enrichment analysis of DEGs
GO enrichment analysis of DEGs
Category	Term	GO ID	Count	%	P-Value
MF	transcription regulator activity	GO:0140110	149	11.3**	0.0094
MF	transporter activity	GO:0005215	98	7.5**	0.0096
CC	cellular anatomical entity	GO:0110165	1217	92.5***	5.1e-06
BP	developmental process	GO:0032502	410	31.2***	5.4e-06
BP	multicellular organismal process	GO:0032501	425	32.3***	0.00047
BP	locomotion	GO:0040011	35	2.7*	0.011
BP	response to stimulus	GO:0050896	530	40.3*	0.012
BP	biological process involved in interspecies interaction between organisms	GO:0044419	116	8.8*	0.021
* P < 0.05 **P<0.01 ***P<0.001

## Sheet: KEGG enrichment analysis of DEG
KEGG enrichment analysis of DEGs
Category	Term	KEGG ID	Count	%	P-Value
KEGG_PATHWAY	Neuroactive ligand-receptor interaction	hsa04080	38	2.9***	0.00036
KEGG_PATHWAY	Cytoskeleton in muscle cells	hsa04820	27	2.1***	0.00054
KEGG_PATHWAY	Transcriptional misregulation in cancer	hsa05202	21	1.6**	0.0056
KEGG_PATHWAY	Cytokine-cytokine receptor interaction	hsa04060	28	2.1**	0.0091
KEGG_PATHWAY	Oxytocin signaling pathway	hsa04921	17	1.3*	0.012
KEGG_PATHWAY	Vascular smooth muscle contraction	hsa04270	15	1.1*	0.018
KEGG_PATHWAY	Hypertrophic cardiomyopathy	hsa05410	12	0.9*	0.022
KEGG_PATHWAY	MAPK signaling pathway	hsa04010	26	2.0*	0.03
KEGG_PATHWAY	Dilated cardiomyopathy	hsa05414	12	0.9*	0.033
KEGG_PATHWAY	Tuberculosis	hsa05152	17	1.3*	0.045
KEGG_PATHWAY	Regulation of lipolysis in adipocytes	hsa04923	8	0.6*	0.046
KEGG_PATHWAY	JAK-STAT signaling pathway	hsa04630	16	1.2*	0.049
* P < 0.05 **P<0.01 ***P<0.001

## Sheet: KEGG of DEGs with ↓expression
KEGG enrichment analysis of differential genes with reduced expression
Category	Term	KEGG ID	Count	%	P-Value
KEGG_PATHWAY	Transcriptional misregulation in cancer	hsa05202	14	2.6***	0.000945758
KEGG_PATHWAY	Cytoskeleton in muscle cells	hsa04820	15	2.8**	0.00136909
KEGG_PATHWAY	Neuroactive ligand-receptor interaction	hsa04080	20	3.8**	0.00142249
KEGG_PATHWAY	Systemic lupus erythematosus	hsa05322	10	1.9**	0.00680458
KEGG_PATHWAY	Alcoholic liver disease	hsa04936	10	1.9**	0.00777806
KEGG_PATHWAY	Hematopoietic cell lineage	hsa04640	8	1.5*	0.010138
KEGG_PATHWAY	Signaling pathways regulating pluripotency	hsa04550	9	1.7*	0.0225587
KEGG_PATHWAY	Tuberculosis 10	hsa05152	10	1.9*	0.0312046
KEGG_PATHWAY	Staphylococcus aureus infection	hsa05150	7	1.3*	0.0358712
KEGG_PATHWAY	Vascular smooth muscle contraction	hsa04270	8	1.5*	0.0423674
* P < 0.05 **P<0.01 ***P<0.001

## Sheet: KEGG of DEGs with ↑expression
KEGG enrichment analysis of differential genes with elevated expression
Category	Term	KEGG ID	Count	%	P-Value
KEGG_PATHWAY	Retinol metabolism	hsa00830	7	0.9*	0.0162079
KEGG_PATHWAY	Oxytocin signaling pathway	hsa04921	11	1.4*	0.0185357
KEGG_PATHWAY	Drug metabolism - cytochrome P450	hsa00982	7	0.9*	0.0222833
KEGG_PATHWAY	Apelin signaling pathway	hsa04371	10	1.3*	0.0253457
KEGG_PATHWAY	Regulation of lipolysis in adipocytes	hsa04923	6	0.8*	0.0318543
KEGG_PATHWAY	Cytokine-cytokine receptor interaction	hsa04060	16	2.0*	0.0351753
KEGG_PATHWAY	MAPK signaling pathway	hsa04010	16	2.0*	0.037298
* P < 0.05 **P<0.01 ***P<0.001

## Sheet: GO of DEGs with ↓expression
GO enrichment analysis of differential genes with reduced expression
Category	Term	GO ID	Count	%	P-Value
BP	positive regulation of potassium ion transmembrane transport	GO:1901381	5	0.9***	0.000475711
BP	inflammatory response	GO:0006954	22	4.1***	0.000838291
BP	phospholipase C-activating G protein-coupled receptor signaling pathway	GO:0007200	10	1.9**	0.00102821
BP	granulocyte-macrophage colony-stimulating factor signaling pathway	GO:0038157	3	0.6**	0.00293759
BP	response to bacterium	GO:0009617	9	1.7**	0.00471096
BP	macrophage chemotaxis	GO:0048246	4	0.8**	0.00607317
BP	positive regulation of leukocyte proliferation	GO:0070665	3	0.6**	0.00712742
BP	positive regulation of cold-induced thermogenesis	GO:0120162	8	1.5**	0.00779074
BP	postsynaptic actin cytoskeleton organization	GO:0098974	4	0.8**	0.00837139
BP	regulation of cell cycle process	GO:0010564	4	0.8**	0.00968669
BP	innate immune response	GO:0045087	23	4.3*	0.0102782
BP	extracellular matrix organization	GO:0030198	10	1.9*	0.012058
BP	positive regulation of apoptotic cell clearance	GO:2000427	3	0.6*	0.0129136
BP	cilium movement	GO:0003341	5	0.9*	0.0155931
BP	positive regulation of cytosolic calcium ion concentration	GO:0007204	9	1.7*	0.0156946
BP	positive regulation of cytokine-mediated signaling pathway	GO:0001961	3	0.6*	0.0201466
BP	positive regulation of monocyte differentiation	GO:0045657	3	0.6*	0.0201466
BP	positive regulation of protein secretion	GO:0050714	5	0.9*	0.0225358
BP	chemotaxis	GO:0006935	8	1.5*	0.0267119
BP	complement activation	GO:0006956	4	0.8*	0.0267671
BP	muscle organ development	GO:0007517	7	1.3*	0.0276388
BP	signal transduction	GO:0007165	41	7.7*	0.029667
BP	protein homooligomerization	GO:0051260	8	1.5*	0.0297766
BP	cellular response to lipopolysaccharide	GO:0071222	10	1.9*	0.0300279
BP	adult behavior	GO:0030534	4	0.8*	0.0345935
BP	defense response	GO:0006952	6	1.1*	0.0358157
BP	positive regulation of protein tyrosine kinase activity	GO:0061098	3	0.6*	0.0384043
BP	defense response to Gram-positive bacterium	GO:0050830	8	1.5*	0.0390827
BP	endochondral ossification	GO:0001958	4	0.8*	0.0403957
BP	calcium ion homeostasis	GO:0055074	4	0.8*	0.0434694
BP	neuron remodeling	GO:0016322	3	0.6*	0.0436663
BP	response to ethanol	GO:0045471	7	1.3*	0.043936
BP	regulation of heart rate by chemical signal	GO:0003062	2	0.4*	0.0444693
BP	positive regulation of ERK1 and ERK2 cascade	GO:0070374	10	1.9*	0.0449995
BP	calcium-mediated signaling	GO:0019722	7	1.3*	0.0455161
BP	neuropeptide signaling pathway	GO:0007218	7	1.3*	0.0455161
BP	learning	GO:0007612	5	0.9*	0.0459009
BP	cell adhesion	GO:0007155	20	3.8*	0.0480158
BP	adenylate cyclase-inhibiting G protein-coupled receptor signaling pathway	GO:0007193	5	0.9*	0.0482855
BP	positive regulation of B cell differentiation	GO:0045777	3	0.6*	0.0491778
BP	oocyte development	GO:0048599	3	0.6*	0.0491778
BP	neuron cell-cell adhesion	GO:0007158	3	0.6*	0.0491778
BP	positive regulation of B cell differentiation	GO:0045579	3	0.6*	0.0491778
BP	regulation of developmental process	GO:0050793	3	0.6*	0.0491778
CC	extracellular region	GO:0005576	93	17.5***	1.84927e-07
CC	extracellular space	GO:0005615	75	14.1***	4.23993e-06
CC	extracellular matrix	GO:0031012	16	3***	0.000250451
CC	collagen-containing extracellular matrix	GO:0062023	22	4.1***	0.000320161
CC	actin cytoskeleton	GO:0015629	18	3.4***	0.000519354
CC	nucleosome	GO:0000786	11	2.1**	0.00196029
CC	collagen trimer	GO:0005581	9	1.7**	0.00267401
CC	granulocyte macrophage colony-stimulating factor receptor complex	GO:0030526	3	0.6**	0.00315717
CC	plasma membrane	GO:0005886	155	29.2**	0.00947045
CC	membrane	GO:0016020	149	28.1*	0.0141987
CC	endoplasmic reticulum	GO:0005783	40	7.5*	0.0272285
CC	endoplasmic reticulum	GO:0005783	40	7.5*	0.0272285
CC	paranode region of axon	GO:0033270	3	0.6*	0.0306939
CC	cytoskeleton	GO:0005856	22	4.1*	0.0396296
CC	filopodium	GO:0030175	8	1.5**	0.00324669
CC	voltage-gated potassium channel complex	GO:0008076	8	1.5**	0.00422154
CC	basement membrane	GO:0005604	8	1.5**	0.00761859
CC	endoplasmic reticulum lumen	GO:0005788	16	3.0**	0.00806191
MF	calcium ion binding	GO:0005509	32	6**	0.00131602
MF	extracellular matrix binding	GO:0050840	5	0.9**	0.00566535
MF	extracellular matrix structural constituent	GO:0005201	9	1.7**	0.0076738
MF	heparin binding	GO:0008201	11	2.1**	0.00973486
MF	structural constituent of chromatin	GO:0030527	8	1.5*	0.0129688
MF	integrin binding	GO:0005178	10	1.9*	0.0132604
MF	growth factor activity	GO:0008083	10	1.9*	0.0153657
MF	hormone activity	GO:0005179	8	1.5*	0.017835
MF	structural constituent of postsynaptic actin cytoskeleton	GO:0098973	3	0.6*	0.0309387
MF	DNA-binding transcription factor binding	GO:0140297	9	1.7*	0.0458894
MF	phosphoethanolamine phosphatase activity	GO:0052732	2	0.4*	0.0463023
MF	interleukin-3 receptor activity	GO:0004912	2	0.4*	0.0463023
MF	E-box binding	GO:0070888	5	0.9*	0.0493299
* P < 0.05 **P<0.01 ***P<0.001

[truncated: 1 more sheets: GO of DEGs with ↑expression]
